## Structural Brain Imaging Studies Offer Clues about the Effects of the Shared Genetic Etiology among Neuropsychiatric Disorders

Nevena V. Radonjić MD, PhD<sup>1</sup>, Jonathan L. Hess PhD<sup>2</sup>, Paula Rovira<sup>3,4</sup>, Ole Andreassen PhD<sup>5</sup>, Jan K. Buitelaar MD, PhD<sup>6,7,8</sup>, Christopher R. K. Ching PhD<sup>9</sup>, Barbara Franke PhD<sup>10,11,7</sup>, Martine Hoogman PhD<sup>10</sup>, Neda Jahanshad PhD<sup>12</sup>, Carrie McDonald PhD<sup>13</sup>, Lianne Schmaal PhD<sup>14,15</sup>, Sanjay M. Sisodiya PhD<sup>16,17</sup>, Dan J. Stein PhD<sup>18</sup>, Odile A. van den Heuvel MD, PhD<sup>19</sup>, Theo G.M. van Erp PhD<sup>20,21</sup>, Daan van Rooij PhD<sup>22</sup>, Dick J. Veltman MD, PhD<sup>23,24</sup>, Paul Thompson PhD<sup>25</sup>, Stephen V. Faraone PhD<sup>2</sup>

<sup>1</sup>Department of Psychiatry, SUNY Upstate Medical University, Syracuse, NY, USA,

<sup>2</sup>Departments of Psychiatry and of Neuroscience and Physiology, SUNY Upstate Medical University, Syracuse, NY, USA, <sup>3</sup>Psychiatric Genetics Unit, Group of Psychiatry, Mental Health and Addiction, Vall d'Hebron Research Institute (VHIR), Universitat Autònoma de Barcelona, Barcelona, Spain, <sup>4</sup>Department of Psychiatry, Hospital Universitari Vall d'Hebron, Barcelona, Spain, <sup>5</sup>NORMENT - Institute of Clinical Medicine, Division of Mental Health and Addiction, Oslo University Hospital and University of Oslo, Oslo, Norway, <sup>6</sup>Radboudumc, Radboud University Medical Center, Nijmegen, The Netherlands, <sup>7</sup>Donders Institute for Brain, Cognition and Behaviour, Radboud University Medical Center, Nijmegen, The Netherlands, <sup>8</sup>Department of Cognitive Neuroscience, Radboud University Medical Center, Nijmegen, The Netherlands, <sup>9</sup>Imaging Genetics Center, USC Mark and Mary Stevens Neuroimaging and Informatics Institute, Keck School of Medicine of the University of Southern California, Marina Del Rey, CA, USA, <sup>10</sup>Department of Human Genetics, Radboud University Medical Center, Nijmegen, The Netherlands, <sup>11</sup>Department of Psychiatry, Radboud University Medical Center, Nijmegen, The

Netherlands, <sup>12</sup>Imaging Genetics Center, Department of Neurology and Biomedical Engineering, USC Mark and Mary Stevens Neuroimaging and Informatics Institute, Keck School of Medicine of USC, University of Southern California, Marina Del Rey, CA, USA, <sup>13</sup>Department of Psychiatry; Center for Multimodal Imaging and Genetics (CMIG), University of California, San Diego, CA, USA, <sup>14</sup>Centre for Youth Mental Health, The University of Melbourne, Parkville, VIC, Australia, <sup>15</sup>Orygen, The National Centre of Excellence for Youth Mental Health, Parkville, VIC, Australia, <sup>16</sup>UCL Queen Square Institute of Neurology, Department of Clinical and Experimental Epilepsy, University College London, London, United Kingdom, <sup>17</sup>Chalfont Centre for Epilepsy, Epilepsy Society, Bucks, United Kingdom, <sup>18</sup>SA MRC Unit on Risk & Resilience in Mental Disorders, Dept of Psychiatry & Neuroscience Institute, University of Cape Town, Cape Town, South Africa, <sup>19</sup>Department of Psychiatry and Department of Anatomy & Neurosciences, Amsterdam University Medical Center, Vrije Universiteit, Amsterdam Neuroscience, Amsterdam, The Netherlands, <sup>20</sup>Clinical Translational Neuroscience Laboratory, Department of Psychiatry and Human Behavior, University of California Irvine, Irvine, CA, USA, <sup>21</sup>Center for the Neurobiology of Learning and Memory, University of California Irvine, Irvine, CA, USA, <sup>22</sup>Donders Centre for Cognitive Neuroimaging, Radboud University Medical Center, Nijmegen, The Netherlands, <sup>23</sup>Department of Psychiatry, Amsterdam UMC/VUmc, Amsterdam, The Netherlands, <sup>24</sup>Department of Anatomy and Neurosciences, Amsterdam UMC/VUmc, Amsterdam, The Netherlands, <sup>25</sup>Neuro Imaging Institute for Neuroimaging and Informatics, Keck School of Medicine of the University of Southern California, Marina Del Rey, CA, USA

**Contact Information for Corresponding author:**

Stephen V. Faraone, Ph.D.

Phone: (315) 464-3113

Fax: (315) 849-1839

E-mail: [sfaraone@childpsychresearch.org](mailto:sfaraone@childpsychresearch.org)

## **Abstract - 203 Words**

**Background:** Genomewide association studies have found significant genetic correlations among many neuropsychiatric disorders. In contrast, we know much less about the degree to which structural brain alterations are similar among disorders and, if so, the degree to which such similarities have a genetic etiology.

**Methods:** From the Enhancing Neuroimaging Genetics through Meta-Analysis (ENIGMA) consortium, we acquired standardized mean differences (SMDs) in regional brain volume and cortical thickness between cases and controls. We had data on 41 brain regions for: attention-deficit/hyperactivity disorder (ADHD), autism spectrum disorder (ASD), bipolar disorder (BD), epilepsy, major depressive disorder (MDD), obsessive compulsive disorder (OCD) and schizophrenia (SCZ). These data had been derived from 24,360 patients and 37,425 controls.

**Results:** The SMDs were significantly correlated between SCZ and BD, OCD, MDD, and ASD. MDD was positively correlated with BD and OCD. BD was positively correlated with OCD and negatively correlated with ADHD. These pairwise correlations among disorders were significantly correlated with the corresponding pairwise correlations among disorders derived from genomewide association studies ( $r = 0.494$ ;  $p = 0.025$ ).

**Conclusions:** Our results show substantial similarities in sMRI phenotypes among neuropsychiatric disorders and suggest that these similarities are accounted for, in part, by corresponding similarities in common genetic variant architectures.

## Introduction

Neuropsychiatric disorders have substantial heritability, as shown by many studies of twins and families (1). Genomewide association studies (GWAS) have shown that common genetic variants account for some of this heritability, and that some of this heritability is shared across neuropsychiatric disorders (2-5). The genetic overlap across disorders may partly explain why these disorders tend to co-occur with one another in both clinical and community samples (6).

Subcortical brain volumes and cortical thickness/surface area dynamically change from early development through adulthood and old age. A study of the Enhancing Neuroimaging Genetics through Meta-Analysis (ENIGMA) Plasticity Working Group reported that changes in structural magnetic resonance imaging (sMRI) phenotypes have heritabilities ranging from 5% for pallidum to 42% for cerebellar gray matter (7). Heritability estimates of change rates were age-related and generally higher in adults than in children, probably due to an increasing influence of genetic factors with age (7). ENIGMA sMRI studies of different psychiatric and neurological disorders further characterized MRI-derived phenotypes that can be used to assess heritability (reviewed in 8).

ENIGMA has also reported significant case vs. control differences in sMRI phenotypes for: attention-deficit/hyperactivity disorder (ADHD) (9, 10), autism spectrum disorder (ASD) (11), bipolar disorder (BD) (12, 13), common epilepsy syndromes (14), major depressive disorder (MDD) (15, 16), obsessive compulsive disorder (OCD) (17, 18) and schizophrenia (SCZ) (19, 20). Each of these disorders shows a pattern of what we have termed selective brain region vulnerability (SBRV) (21, 22). By this, we mean that some brain regions may be more vulnerable to the genetic and environmental risk factors associated with each disorder. If that is true, some brain regions should show volumetric case-control differences and others not, and this should be correlated among disorders that share risk factors. To date, there has been no cross-disorder study of SBRV for the disorders for which such differences have previously been

reported in the ENIGMA consortium. Given that pairs of ENIGMA disorders show a range of genetic correlations, studying SBRV across disorders should supply clues as to the degree to which common genetic variants explain SBRV in these disorders. Because SBRV may reflect differential vulnerability of cells to stresses caused by environmental exposures and/or genetic predisposition, clarifying the extent and etiology of SBRV could have implications for therapeutic developments. If genetic risk factors are involved in SBRV, we hypothesized that SBRV would be correlated among disorders and that the magnitude of these correlations would mirror the magnitude of their genetic correlations from GWAS studies.

## **Methods**

### ***Collection of structural neuroimaging summary statistics***

Summary statistics from ENIGMA structural neuroimaging studies were collected from 12 multi-site analyses published by the ENIGMA Consortium for the following neuropsychiatric disorders: ADHD (9, 10), ASD (11), BD (12, 13), epilepsy (14), MDD (15, 16), OCD (17, 18), and SCZ [van Erp, 2015 #27707; van Erp, 2018 #27708]. The ADHD and ASD samples comprised both youth and adults. The other samples comprised adults only. The "epilepsy" cohort comprised temporal lobe epilepsy, genetic generalized epilepsy, and extra temporal epilepsy. We analyzed 7 subcortical and 34 cortical regions (total of 41 brain regions; the mean of left and right structures) that were included in the above specified ENIGMA studies. We extracted the covariate-adjusted Cohen's *D* standardized mean differences (SMDs) denoting the case versus unaffected comparison subject differences in subcortical volume and cortical thickness/surface area measures. The covariates used in these studies adjusted SMDs for several covariates as indicated in Supplemental Table 1.

### **Collection of GWAS results among neuropsychiatric disorders**

Publicly available summary statistics from GWAS were downloaded from the Psychiatric Genomics Consortium (PCG) website (<https://www.med.unc.edu/pgc/results-and-downloads/>)

with the exception of GWAS results for MDD coming from an online resource hosted by the University of Edinburgh (<http://dx.doi.org/10.7488/ds/2458>) and of GWAS results for epilepsy coming from the online Epilepsy Genetic Association Database (epiGAD) ([http://www.epigad.org/gwas\\_ilae2018\\_16loci.html](http://www.epigad.org/gwas_ilae2018_16loci.html)). Presented in Supplementary Table 2 are the numbers of affected cases and unaffected control participants included in each GWAS. Note, the full meta-analysis GWAS of MDD that included data from 23andMe was not available for public release, thus we used the meta-analysis that combined results from the PGC cohorts and UK Biobank.

### ***Genetic and sMRI phenotype correlations among neuropsychiatric disorders***

Linkage disequilibrium (LD)-score regression, a popular approach designed to analyze summary statistics from GWAS, was used to quantify the amount of shared genetic heritability, or genetic correlation ( $r_g$ ), existing between pairs of neuropsychiatric disorders, considering HapMap3 LD-scores [Bulik-Sullivan, 2015 #25520]. For these analyses, the largest and latest GWAS available for each neuropsychiatric disorder was selected and filtered to exclude markers with  $INFO < 0.90$  or within the MHC region (hg19:chr6:25-35Mb) (Supplementary Table 1).

To derive an estimate of the degree to which sMRI phenotypes were similar among disorders, we computed pairwise Pearson's correlation coefficients between the Cohen's  $D$  SMDs for each pair of disorders. We then used Pearson's correlation to estimate, whether the genetic correlations for each disorder covaried with the sMRI phenotype correlations. In a leave-one-out analysis, we iteratively excluded one pair of disorder correlations from the set and recalculated Pearson's correlation coefficients to determine whether correlations were driven by any pair of disorders. We used classical multidimensional scaling (MDS) with correlation as the distance measure to visualize and help interpret the sMRI phenotype correlations. MDS

summarizes the correlations among disorders in their SMDs by plotting them in a low-dimensional space for which the distance between disorders is proportional to their correlations. Binomial sign tests were used to determine whether the number of disorders showing the same direction of effect in the sMRI phenotypes was greater than expected by chance (null probability of 50%). Per brain region, we performed Cochran's *Q* test implemented in the *R* package *metafor* (v.2.1-0) to determine whether variability among Cohen's *D* values was greater than expected by chance. All statistical analyses were performed with *R* version 3.5.2 (R Core Team, 2018), except for multidimensional scaling, for which we used STATA15 (23). We adjusted for repeated correlation tests using the Bonferroni procedure. Correlations showing a Bonferroni-adjusted  $p < 0.05$  were considered significant (threshold  $p = 0.00227$ ).

## Results

Sample demographics for the twelve studies by the ENIGMA Consortium on structural brain abnormalities in neuropsychiatric disorders are presented in Table 1.

### ***Case-control differences in subcortical volume and cortical surface area and thickness within neuropsychiatric disorders***

Figure 1 presents a heatmap graph showing standardized effect sizes (Cohen's *D*) measuring alterations in subcortical volume, cortical surface area and cortical thickness for 41 brain regions within seven neuropsychiatric disorders – ADHD, ASD, OCD, epilepsy, MDD, BD and SCZ. These have been reported on prior publications. The variation in color from blue to red illustrates the phenomenon of SBRV, with some regions showing significant reductions (blue) in volume/thickness/ surface areas and others not being affected. As indicated by the blueness of the cells, the most prominent reductions were seen for SCZ (mean Cohen's *D* across all regions = -0.22, SE = 0.014), epilepsy (mean Cohen's *D* = -0.12, SE = 0.017) and BD (mean Cohen's *D* = -0.097, SE = 0.011). The smallest changes were observed for MDD (mean



Cohen's  $D = -0.018$ ,  $SE = 0.006$ ). All regions except for the caudate and putamen exhibited significant differences in the magnitude of Cohen's  $D$  across disorders (Cochran's  $Q$   $p$ -values =  $0.012 - 2.8 \times 10^{-32}$ ). Eighteen sMRI phenotypes exhibited homogeneity with respect to sign of Cohen's  $D$  across each of the neuropsychiatric disorders evaluated (binomial sign test  $p$ -values  $< 0.05$ ): cortical thicknesses for caudal middle frontal gyrus, entorhinal cortex, fusiform gyrus, inferior temporal gyrus, insula, lateral orbitofrontal cortex, lingual gyrus, middle temporal gyrus, paracentral lobule, parahippocampal gyrus, pars opercularis of inferior temporal gyrus, precentral gyrus, precuneus, rostral anterior cingulate cortex, and supramarginal gyrus; subcortical volume for the hippocampus; and surface area for middle temporal gyrus, pars triangularis of inferior temporal gyrus, and pericalcarine cortex. For sMRI phenotypes for 39 regions of interest varying degrees of heterogeneity were noted in terms of discrepancy of signs of Cohen's  $D$ . For example, individuals with ASD showed a slightly thicker cortex in the rostral middle frontal gyrus, individuals with ADHD showed no difference, and all other disorders showed a thinner cortex in this region compared to controls.

### ***sMRI phenotype correlations among neuropsychiatric disorders***

For each pair of disorders, we computed the Pearson correlation between their sMRI phenotypes listed in Figure 1. These are listed in Table 2, sorted by the magnitude of the correlation. The highest positive correlation was between SCZ and BD ( $r=0.81$ ,  $df = 73$ ,  $p < 1.3 \times 10^{-18}$ , Bonferroni  $p = 2.38 \times 10^{-17}$ ). SCZ was also positively correlated with OCD ( $r=0.65$ ,  $df = 72$ ,  $p = 5.5 \times 10^{-10}$ , Bonferroni  $p = 1.2 \times 10^{-8}$ ), ASD ( $r = 0.36$ ,  $df = 73$ ,  $p = 0.0014$ , Bonferroni  $p = 0.03$ ), and MDD ( $r=0.57$ ,  $df = 73$ ,  $p = 5.5 \times 10^{-8}$ , Bonferroni  $p = 1.2 \times 10^{-6}$ ). MDD was positively correlated with BD ( $r=0.68$ ,  $df = 73$ ,  $p = 1.2 \times 10^{-11}$ , Bonferroni  $p = 2.5 \times 10^{-10}$ ) and OCD ( $r=0.46$ ,  $df = 72$ ,  $p = 3.3 \times 10^{-5}$ , Bonferroni  $p = 6.9 \times 10^{-4}$ ). BD was positively correlated with OCD ( $r=0.50$ ,  $df = 72$ ,  $p = 4.7 \times 10^{-6}$ , Bonferroni  $p = 9.9 \times 10^{-5}$ ) and ASD ( $r=0.38$ ,  $df = 73$ ,  $p = 9.0 \times 10^{-4}$ , Bonferroni  $p = 0.02$ ), and negatively correlated with ADHD ( $r=-0.53$ ,  $df = 73$ ,  $p = 1.2 \times 10^{-6}$ , Bonferroni  $p = 2.5 \times 10^{-5}$ ).

There were a few additional nominally significant negative correlations, which did not survive multiple testing correction: MDD and epilepsy ( $r=-0.37$ ,  $p=0.02$ ), MDD and ADHD ( $r=-0.33$ ,  $p=0.004$ ), SCZ and ADHD ( $r=-0.32$ ,  $p=0.005$ ), ADHD and epilepsy ( $r=-0.36$ ,  $p=0.02$ ), and a positive correlation between MDD and ASD ( $r = 0.26$ ,  $p = 0.02$ ).

Figure 2 visualizes the cross-disorder sMRI phenotype correlations by presenting the MDS configuration. We chose a three-dimensional solution, which accounted for 96.3% of the variation in the sMRI phenotype correlations. The Shepard diagram (Figure 2a) shows a good correspondence between the actual correlations and those predicted by the scaling solution. The three configuration plots illustrate the cross-disorder similarity in sMRI brain phenotypes (Figures 2b, c & d). Figure 2b shows that dimension 1 separates SCZ from other disorders, and dimension 2 separates epilepsy from other disorders. Figures 2c and 2d show that dimension 3 captures variation that separates ADHD and ASD from the mood disorders and OCD. Figure 2d provides another view of the same data, which confirms that epilepsy is an outlier on dimension 2.

### ***Correlation of shared genetic heritability with brain structural correlation***

Figure 3 shows the pairwise correlations of sMRI phenotypes and genetic overlap across each pair of neuropsychiatric disorders. The vertical axis represents the between-disorder LD-score genetic correlations obtained from the PGC studies. The horizontal axis represents the between-disorder Cohen's D value correlations for sMRI abnormalities obtained from the ENIGMA studies. Each dot represents genetic correlation and the Cohen's D value correlation pairs for disorders as indicated by the legend (e.g., SCZ and BD, represented in the top right corner, show high genetic correlations and high correlations among their structural phenotype abnormalities compared to controls). The LD-score cross-disorder genetic correlations are positively correlated with the sMRI phenotype cross-disorder correlations ( $r = 0.49$ ,  $p = 0.025$ ), thus we approximated that 24% of variance (measured by  $R^2$ ) in cross-disorder sMRI similarity can be accounted for by genetic correlations. Leave-one-out sensitivity analyses confirmed that

the direction of the correlation remained positive and roughly at the same magnitude despite removal of individual pairs of disorders from the correlation test (range of Pearson's  $r = 0.35 - 0.60$ , range of  $p$ -values =  $0.127 - 0.005$ ), with the exception of removing SCZ/BD (Pearson's  $r = 0.35$ ,  $p=0.127$ ) leading to a non-significant correlation. SCZ and BD showed the highest degree of concordance with respect to genetic and sMRI phenotype correlations.

## Discussion

Our analysis of summary statistics from the ENIGMA ADHD, ASD, BD, MDD, OCD, SCZ and epilepsy Working Groups and the predominantly PGC case-control GWAS identified two novel findings. First, we found substantial correlations for some disorders in the pattern of sMRI case-control differences across subcortical and cortical regions that we postulate represent selective brain region vulnerability (SBRV). Second, these cross-disorder correlations in SBRV could partly be explained by the genetic correlations reported for these disorders from genomewide association studies (3).

The cross-disorder correlations in SBRV are intriguing because, like cross-disorder genetic correlations, they suggest that these disorders, to varying degrees, share aspects of their etiology and pathophysiology. Any interpretation of the cross-disorder sMRI correlations must keep in mind that, for all disorders, the case-control differences in sMRI measures are small (Figure 1). The largest Cohen's D values are only -0.5 for SCZ (19, 20), -0.4 for epilepsy (14), -0.3 for BD (12, 13), -0.2 for ADHD (9, 10) and ASDs (11), and -0.1 for MDD (15, 16) and OCD (17, 18). These small case-control differences are consistent with results from GWAS and environmental risk studies, which speaks to the fact that the effects of common risk factors are, with some rare exceptions, individually small. Although it is conceivable that these small risks could accumulate to create a more dramatic pathophysiology in the brain, the ENIGMA data show that this is not the case for sMRI measures. Consistent with this finding, interindividual

differences in neuroimaging account for only a small amount of the variance in symptom expression or behavioral measures of symptomatic or behavioral variance (24).

The most prominent case-control differences in cortical thickness/surface area and subcortical volumes were observed for SCZ (19, 20) and BD (12, 13). These disorders also had the highest sMRI phenotype correlations and both also showed strong sMRI phenotype correlations with MDD (15, 16) and OCD (17, 18). As Figure 2 shows, these disorders clustered together in the three-dimensional configuration required to capture cross-disorder sMRI phenotype similarity. The high sMRI correlation between SCZ and BD is consistent with prior reports of sMRI similarities between the two disorders (25). Moreover, a large body of literature reports substantial etiologic overlap between the two disorders (26-30). Because of such data, the SCZ and BD have been described as sharing a continuum of etiology leading to psychotic (31), neurophysiological (31) and neurocognitive (32) symptoms. The ENPACT study (33) showed shared fronto-temporo-occipital grey matter volume deficits in the right hemisphere of two disorders. A systematic review of associations between functional MRI activity and polygenic risk for SCZ and BD (27) reported that genetic load for these disorders affects task-related recruitment of predominantly frontal lobe brain regions.

Many studies have reported that OCD can be a comorbid diagnosis with SCZ or that patients with SCZ can have OCD symptoms (34-41). Presented findings of a significant overlap in sMRI phenotypes along with the known SCZ/OCD genetic correlations suggests that more work should examine shared pathophysiologic features between these disorders and should assess the degree to which confounds, such as medication status or chronicity, might explain these results.

The sMRI phenotype correlations mirror, to some extent, the cross-disorder correlations from genomewide association studies. Figure 3 shows a modest, yet distinct, linear correlation between the sMRI phenotype and genetic correlations. In the upper right-hand section of the plot, we see disorders having high genetic and high sMRI correlations. These are SCZ/BD,

SZ/MDD, BD/MDD, OCD/BD and OCD/MDD. The inclusion of MDD in this group is notable given that it is part of the bipolar diagnosis and often occurs comorbid with other disorders. MDD also has a high genetic correlation with ADHD but a negative sMRI correlation, which makes that pair an outlier in Figure 3.

In the lower left region of Figure 3, we see disorders with low genetic and low sMRI correlations. These involve correlations of epilepsy, and correlations of ADHD with all disorders except ASDs and MDD, although the latter is somewhat of an outlier. ASDs tend to have both modest genetic correlations and modest sMRI correlations with most other disorders and, hence, populates the middle range of the figure. Like the sMRI correlations among disorders, all genetic correlations with epilepsy are low, which is consistent with the low genetic correlation between neurological disorders and disorders characterized by behavioral (or psychiatric) symptoms as reported by Anttila et al. (2).

The finding that SBRV correlations are correlated with genetic correlations suggests that future studies of SBRV should consider genetic sources of etiology. Yet, because only about 24% of the variance in the SBRV correlations can be accounted for by the genetic correlations, environmental sources of etiology and disease-specific genetic contributions must also be considered. These include shared confounders, such as chronicity and medication exposure, along with shared etiologic events such as birth complications or exposure to toxins *in utero*. Our prior studies of SBRV in ADHD implicated the regulation of genes in apoptosis, autophagy and neurodevelopment pathways in ADHD (21, 22). Neurodevelopmental pathways had also been implicated in the cross-disorder analysis of the Psychiatric Genomics Consortium (3), which suggests that cross-disorder similarities in these pathways may account for cross disorder similarities in SBRV.

Although we used data derived from very large samples (ENIGMA, iPSYCH and the PGC), several limitations moderate the strength of our conclusions. We inherit all the limitations of the constituent studies, but are further limited because we analyzed summary statistics, not

the original data, which would require the sharing of individual subject level data, an ongoing effort among the ENIGMA disorder working groups. Thus, we cannot determine whether the possible use of controls shared among studies affected our results. It is also possible that some research participants were included in the genetic and sMRI data sets for the same disorder. Another problem is that we could not address effects of medications or chronicity on brain structure. Furthermore, for some of the disorders, we could use youth and adult data, whereas for others only adult effect data were used. Because findings can differ substantially depending on the age range of the samples included (e.g., (9, 10, 17, 18)), this might have influenced our findings. For these reasons, analyses of participant level data will be needed to address these issues to draw stronger and more detailed conclusions. We also did not have any longitudinal data available, which limits the ability to test hypotheses about shared and unique developmental trajectories among disorders.

Despite these limitations, we have documented cross-disorder correlations in SBRV as assessed by sMRI. These cross-disorder SBRV correlations are positively associated with the disorders' corresponding cross-disorder genetic correlations. This finding is a novel contribution worthy of further study. Our work supports conclusions from previous GWAS studies suggesting a partially shared etiology and pathophysiology among many disorders (2, 42). Disorders like SCZ and BD or ADHD and ASD, which are distinct in the diagnostic nomenclature, show significant overlap in etiology and pathophysiology. Further studies are needed to discern why brain regions are selectively affected by the risk factors that cause sMRI abnormalities and why these effects are correlated across disorders. Such studies may give insights into new treatment targets.

### **Data availability**

#### ***URLs for GWAS***

SCZ from [ckqny.scz2snpres.gz](http://ckqny.scz2snpres.gz)

(<https://www.med.unc.edu/pgc/results-and-downloads>)

ASD from [iPSYCH-PGC\\_ASD\\_Nov2017.gz](#) (<https://www.med.unc.edu/pgc/results-and-downloads>)

OCD from [PGC\\_OCD\\_Aug2017-20171122T182645Z-001.zip > ocd\\_aug2017.gz](#)  
(<https://www.med.unc.edu/pgc/results-and-downloads>)

ADHD from [adhd\\_jul2017.gz](#)  
(<https://www.med.unc.edu/pgc/results-and-downloads>)

BD from [daner\\_PGC\\_BIP32b\\_mds7a\\_0416a.gz](#) (<https://www.med.unc.edu/pgc/results-and-downloads>)

Epilepsy from [all\\_epilepsy\\_METAL.gz](#)  
([http://www.epigad.org/gwas\\_ilae2018\\_16loci.html](http://www.epigad.org/gwas_ilae2018_16loci.html))

MDD from [PGC\\_UKB\\_depression\\_genome-wide.txt](#)  
(<http://dx.doi.org/10.7488/ds/2458>)

### **Acknowledgment**

Dr. Faraone is supported by the European Union's Seventh Framework Programme for research, technological development and demonstration under grant agreement no 602805, the European Union's Horizon 2020 research and innovation programme under grant agreements No 667302 & 728018 and NIMH grants 5R01MH101519 and U01 MH109536-01. Research Council of Norway (#223273). Dr. Franke is supported by a personal Vici grant from the Netherlands Organization for Scientific Research (NWO, grant number 91813669) and by a

grant from the European Union's Horizon 2020 program for the CoCa project (grant agreement no 667302). ENIGMA work is supported by NIH grants U54 EB020403 (PI: Thompson), R01 MH116147 (PI: Thompson) and R01MH117601 (MPIs: Jahanshad & Schmaal). Dr Hoogman is supported by a personal Veni grant from the Netherlands Organization for Scientific Research (NWO, grant number 91619115). Dr. McDonald is supported by NIH grants R01 NS065838 and R21 NS107739. P.Rovira is a recipient of a pre-doctoral fellowship from the Agència de Gestió d'Ajuts Universitaris i de Recerca (AGAUR), Generalitat de Catalunya, Spain (2016FI\_B 00899). Dr. Schmaal is supported by a NHMRC Career Development Fellowship (1140764). Dr Sisodiya is supported by Epilepsy Society, UK, and the work was partly undertaken at UCLH/UCL, which received a proportion of funding from the UK Department of Health's NIHR Biomedical Research Centres funding scheme.). Dr. Van Erp is supported by NIH grants U54 EB020403 (PI: Thompson), R01 MH116147 (PI: Thompson), R01MH117601 (MPIs: Jahanshad & Schmaal), and R01MH121246 (MPIs: Turner, Van Erp, & Calhoun).

### **Financial Disclosures**

Dr. Andreassen has received speaker's honorarium from Lundbeck and is a consultant to HealthLytix. In the past year, Dr. Faraone received income, potential income, travel expenses continuing education support and/or research support from Tris, Otsuka, Arbor, Ironshore, Shire, Akili Interactive Labs, Enzymotec, Sunovion, Supernus and Genomind. With his institution, he has US patent US20130217707 A1 for the use of sodium-hydrogen exchange inhibitors in the treatment of ADHD. He also receives royalties from books published by Guilford Press: Straight Talk about Your Child's Mental Health, Oxford University Press: Schizophrenia: The Facts and Elsevier: ADHD: Non-Pharmacologic Interventions. He is Program Director of [www.adhdinadults.com](http://www.adhdinadults.com). Dr. Franke received educational speaking fees from Medice. All other authors declare no conflict of interest.



**Figure 1. Case-control differences in subcortical volume and cortical thickness and surface area within neuropsychiatric disorders**

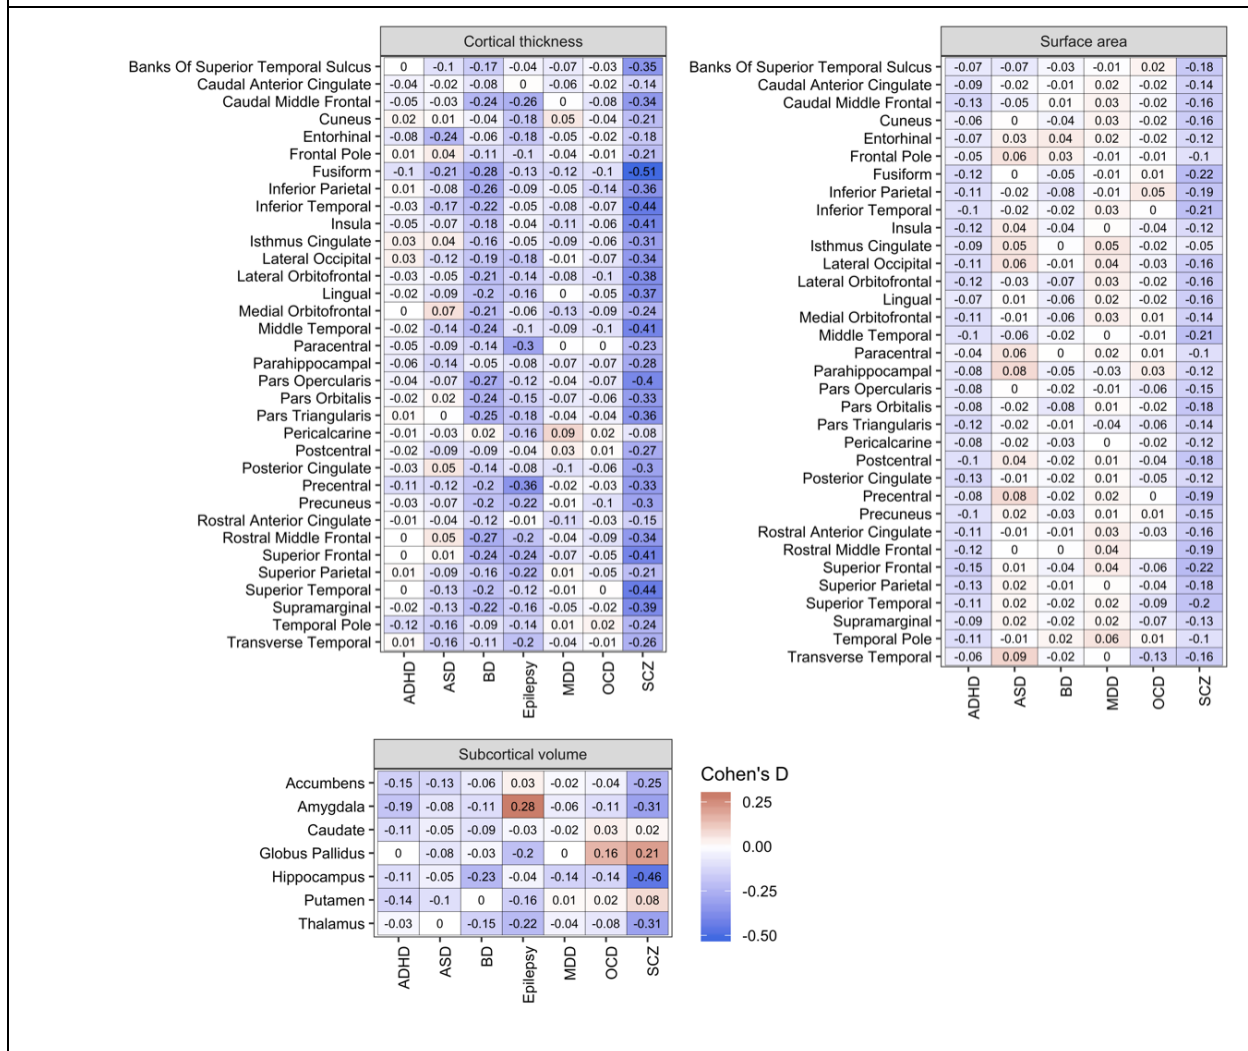

Figure 1 legend: A heatmap showing standardized mean differences (Cohen's  $D$ ) measuring case-control differences in subcortical volumes and cortical thickness for seven neuropsychiatric disorders. Results were obtained from ENIGMA working group publications. Negative values for Cohen's  $D$  indicate smaller sizes of brain regions in cases versus unaffected comparisons.

Note: ADHD – attention-deficit/hyperactivity disorder; ASD – autism spectrum disorder; BD – bipolar disorder; MDD – major depressive disorder; OCD – obsessive compulsive disorder; SCZ – schizophrenia.

**Figure 2: Multidimensional Scaling Configuration of sMRI Phenotype  
Cross Disorder Correlations**

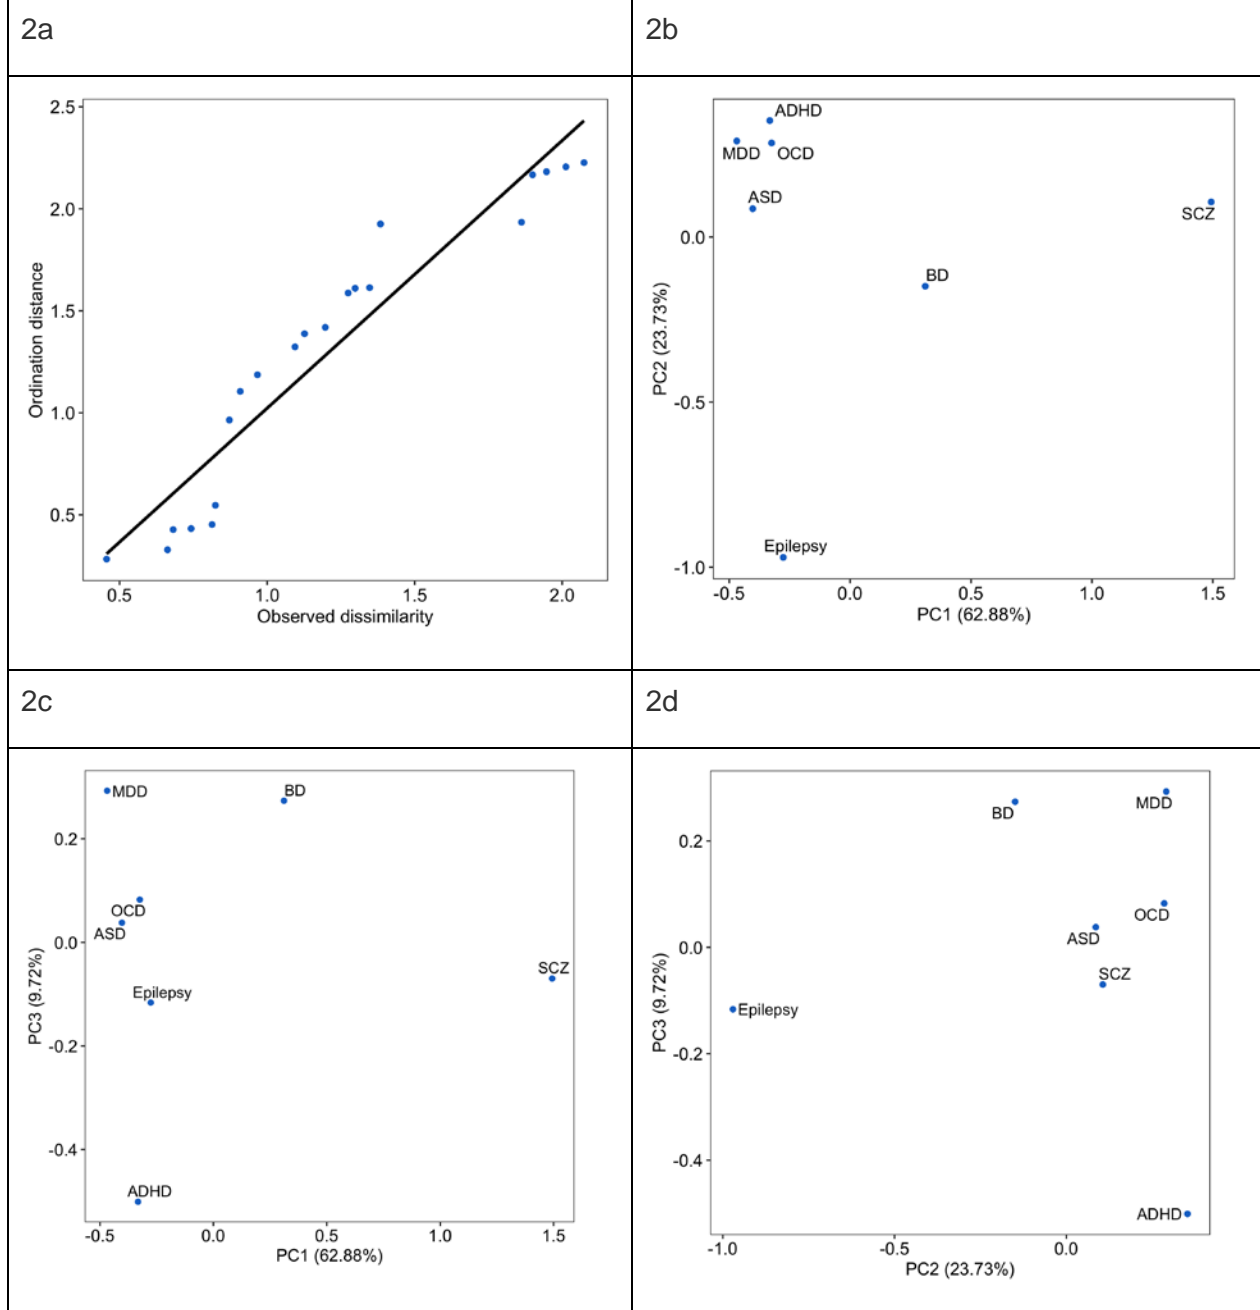

Figure legend: The Shepard diagram (Figure 2a) shows correspondence between the actual correlations and those predicted by the scaling solution. The three configuration plots illustrate the cross-disorder similarity in sMRI brain phenotypes according to principal component values (Figures 2b, c & d).

Note: ADHD – attention-deficit/hyperactivity disorder; ASD – autism spectrum disorder; BD – bipolar disorder; MDD – major depressive disorder; OCD – obsessive compulsive disorder; SCZ – schizophrenia.

**Figure 3. Correlation of shared genetic heritability with brain structural correlation**

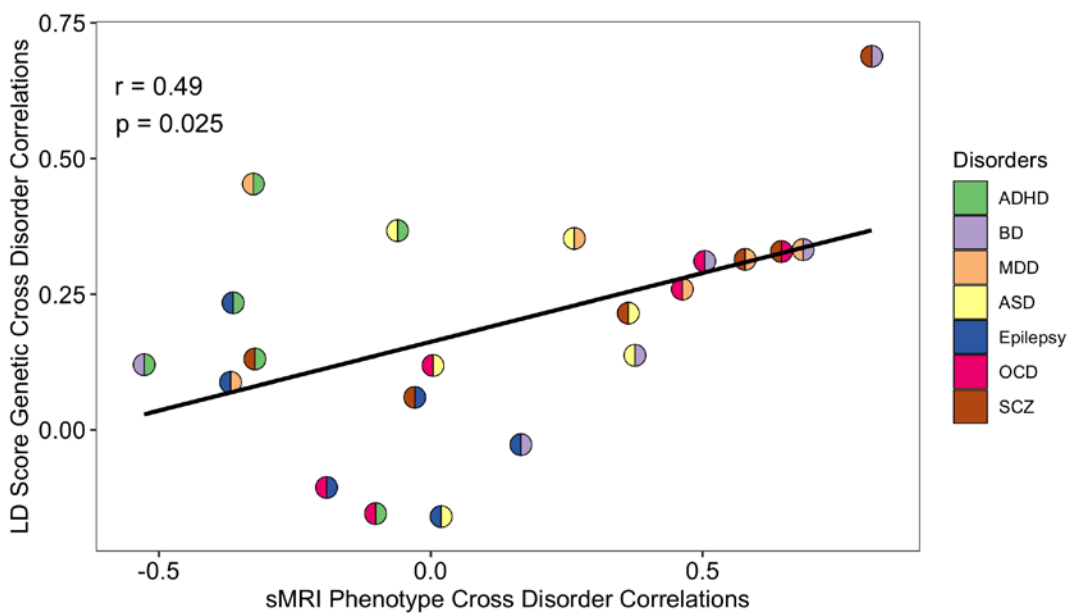

**Figure legend:** Scatter plot showing the correlation of correlations. Genetic correlations ( $r_g$ ) computed by LD-score regression are on the vertical axis, with correlations of Cohen's  $D$  values displayed on the horizontal axis. Each dot is color-coded according to the pair-wise disorder correlations that were computed. The best-fit regression line was drawn. The Pearson's correlation coefficient and  $p$ -value are provided within the panel.

**Note:** ADHD – attention-deficit/hyperactivity disorder; ASD – autism spectrum disorder; BD – bipolar disorder; MDD – major depressive disorder; OCD – obsessive compulsive disorder; SCZ – schizophrenia.

**Table 1.** Sample demographics for the twelve studies by the ENIGMA Consortium into structural brain alterations in neuropsychiatric disorders.

| Disorder | MRI measure        | Cases (n) | Controls (n) | Total n | Sites | Weighted mean age (cases) | Weighted mean age (controls) | References |
|----------|--------------------|-----------|--------------|---------|-------|---------------------------|------------------------------|------------|
| ADHD     | Cortical thickness | 2,246     | 1,934        | 4,180   | 36    | 19.2                      | 18.1                         | 1,2        |
|          | Surface area       | 2,246     | 1,934        | 4,180   | 36    | 19.2                      | 18.1                         |            |
|          | Subcortical volume | 1,713     | 1,529        | 3,242   | 23    | 18.6                      |                              |            |
| ASD      | Cortical thickness | 1,571     | 1,651        | 3,222   | 49    | 15.4                      |                              | 3          |
|          | Surface area       |           |              |         |       |                           |                              |            |
|          | Subcortical volume |           |              |         |       |                           |                              |            |

|          |                    |       |       |       |    |       |       |     |
|----------|--------------------|-------|-------|-------|----|-------|-------|-----|
| BD       | Cortical thickness | 1,837 | 2,582 | 4,419 | 28 | 38.4* | 35.6* | 4,5 |
|          | Surface area       | 1,820 | 2,582 | 4,402 | 28 | 38.4* | 35.6* |     |
|          | Subcortical volume | 1,710 | 2,594 | 4,304 | 20 | 40.1* | 36.5* |     |
| Epilepsy | Cortical thickness | 2,149 | 1,727 | 3,876 | 24 | 34.4  | 33.3  | 6   |
|          | Subcortical volume |       |       |       |    |       |       |     |
| MDD      | Cortical thickness | 1,911 | 7,663 | 9,574 | 20 | 44.8* | 54.6* | 7,8 |
|          | Surface area       | 1,902 | 7,658 | 9,560 | 20 | 44.8* | 54.6* |     |
|          | Subcortical volume | 1,728 | 7,199 | 8,927 | 15 | 43.3* | 56*   |     |

|     |                    |       |       |       |    |       |       |       |
|-----|--------------------|-------|-------|-------|----|-------|-------|-------|
| OCD | Cortical thickness | 1,498 | 1,435 | 2,933 | 27 | 32.1  | 30.5  | 9,10  |
|     | Surface area       | 1,497 | 1,433 | 2,930 | 27 | 32.1  | 30.5  |       |
|     | Subcortical volume | 1,495 | 1,472 | 2,967 | 25 | 32.0  | 30.6  |       |
| SCZ | Cortical thickness | 4,474 | 5,098 | 9,572 | 39 | 32.3* | 34.5* | 11,12 |
|     | Surface area       | 4,434 | 5,073 | 9,507 | 39 | 32.3* | 34.5* |       |
|     | Subcortical volume | 2,028 | 2,540 | 4,568 | 15 | 34.0* | 31.0* |       |

\*Weighted mean not provided in paper; computed from descriptive statistics



**Table 2.** Cross-disorder structural MRI phenotype correlations (ordered from smallest to largest *p*-value) based on Cohen's *D* values obtained from the ENIGMA Project.

| Disorder 1 | Disorder 2 | sMRI correlation   |    |       |                 | Boferroni adjusted <i>p</i> -value |
|------------|------------|--------------------|----|-------|-----------------|------------------------------------|
|            |            | Pearson's <i>r</i> | df | se    | <i>p</i> -value |                                    |
| BD         | SCZ        | 0.81               | 73 | 0.068 | 1.13E-18        | 2.38E-17                           |
| BD         | MDD        | 0.69               | 73 | 0.085 | 1.21E-11        | 2.55E-10                           |
| OCD        | SCZ        | 0.65               | 72 | 0.090 | 5.53E-10        | 1.16E-08                           |
| MDD        | SCZ        | 0.58               | 73 | 0.095 | 5.55E-08        | 1.17E-06                           |
| ADHD       | BD         | -0.53              | 73 | 0.099 | 1.18E-06        | 2.48E-05                           |
| BD         | OCD        | 0.50               | 72 | 0.102 | 4.74E-06        | 9.95E-05                           |
| MDD        | OCD        | 0.46               | 72 | 0.104 | 3.28E-05        | 6.89E-04                           |
| ASD        | BD         | 0.38               | 73 | 0.108 | 8.98E-04        | 0.02                               |
| ASD        | SCZ        | 0.36               | 73 | 0.109 | 1.35E-03        | 0.03                               |
| ADHD       | MDD        | -0.33              | 73 | 0.111 | 4.27E-03        | 0.09                               |
| ADHD       | SCZ        | -0.32              | 73 | 0.111 | 4.63E-03        | 0.10                               |
| Epilepsy   | MDD        | -0.37              | 39 | 0.149 | 0.02            | 0.38                               |
| ADHD       | Epilepsy   | -0.36              | 39 | 0.149 | 0.02            | 0.41                               |
| ASD        | MDD        | 0.26               | 73 | 0.113 | 0.02            | 0.46                               |
| Epilepsy   | OCD        | -0.19              | 39 | 0.157 | 0.23            | 1                                  |

|          |          |       |    |       |      |   |
|----------|----------|-------|----|-------|------|---|
| BD       | Epilepsy | 0.17  | 39 | 0.158 | 0.30 | 1 |
| ADHD     | OCD      | -0.10 | 72 | 0.117 | 0.39 | 1 |
| ADHD     | ASD      | -0.06 | 73 | 0.117 | 0.60 | 1 |
| Epilepsy | SCZ      | -0.03 | 39 | 0.160 | 0.86 | 1 |
| ASD      | Epilepsy | 0.02  | 39 | 0.160 | 0.91 | 1 |
| ASD      | OCD      | 0.00  | 72 | 0.118 | 0.97 | 1 |

## References:

1. Polderman TJ, Benyamin B, de Leeuw CA, Sullivan PF, van Bochoven A, Visscher PM, et al. Meta-analysis of the heritability of human traits based on fifty years of twin studies. *Nat Genet.* 2015;47(7):702-9.
2. Anttila V, Bulik-Sullivan B, Finucane HK, Walters RK, Bras J, Duncan L, et al. Analysis of shared heritability in common disorders of the brain. *Science.* 2018;360(6395):eaap8757.
3. Lee PH, Anttila V, Won H, Feng Y-CA, Rosenthal J, Zhu Z, et al. Genome wide meta-analysis identifies genomic relationships, novel loci, and pleiotropic mechanisms across eight psychiatric disorders. *bioRxiv.* 2019:528117.
4. Lee SH, Ripke S, Neale BM, Faraone SV, Purcell SM, Perlis RH, et al. Genetic relationship between five psychiatric disorders estimated from genome-wide SNPs. *Nat Genet.* 2013;45(9):984-94.
5. Smoller JW, Andreassen OA, Edenberg HJ, Faraone SV, Glatt SJ, Kendler KS. Psychiatric genetics and the structure of psychopathology. *Mol Psychiatry.* 2018.
6. Buckholtz Joshua W, Meyer-Lindenberg A. Psychopathology and the Human Connectome: Toward a Transdiagnostic Model of Risk For Mental Illness. *Neuron.* 2012;74(6):990-1004.
7. Brouwer RM, Panizzon MS, Glahn DC, Hibar DP, Hua X, Jahanshad N, et al. Genetic influences on individual differences in longitudinal changes in global and subcortical brain volumes: Results of the ENIGMA plasticity working group. *Human Brain Mapping.* 2017;38(9):4444-58.
8. Thompson PM, Andreassen OA, Arias-Vasquez A, Bearden CE, Boedhoe PS, Brouwer RM, et al. ENIGMA and the individual: Predicting factors that affect the brain in 35 countries worldwide. *NeuroImage.* 2017;145:389-408.
9. Hoogman M, Bralten J, Hibar DP, Mennes M, Zwiers MP, Schweren LSJ, et al. Subcortical brain volume differences in participants with attention deficit hyperactivity disorder in children and adults: a cross-sectional mega-analysis. *Lancet Psychiatry.* 2017;4(4):310-9.
10. Hoogman M, Muetzel R, Guimaraes JP, Shumskaya E, Mennes M, Zwiers MP, et al. Brain Imaging of the Cortex in ADHD: A Coordinated Analysis of Large-Scale Clinical and Population-Based Samples. *American Journal Of Psychiatry.* 2019:appiajp201918091033.
11. van Rooij D, Anagnostou E, Arango C, Auzias G, Behrmann M, Busatto GF, et al. Cortical and Subcortical Brain Morphometry Differences Between Patients With Autism Spectrum Disorder and Healthy Individuals Across the Lifespan: Results From the ENIGMA ASD Working Group. *American Journal of Psychiatry.* 2018;175(4):359-69.
12. Hibar DP, Westlye LT, van Erp TG, Rasmussen J, Leonardo CD, Faskowitz J, et al. Subcortical volumetric abnormalities in bipolar disorder. *Mol Psychiatry.* 2016;21(12):1710-6.
13. Hibar DP, Westlye LT, Doan NT, Jahanshad N, Cheung JW, Ching CRK, et al. Cortical abnormalities in bipolar disorder: an MRI analysis of 6503 individuals from the ENIGMA Bipolar Disorder Working Group. *Molecular Psychiatry.* 2017;23:932.
14. Whelan CD, Altmann A, Botia JA, Jahanshad N, Hibar DP, Absil J, et al. Structural brain abnormalities in the common epilepsies assessed in a worldwide ENIGMA study. *Brain.* 2018;141(2):391-408.

15. Schmaal L, Veltman DJ, van Erp TGM, Sämann PG, Frodl T, Jahanshad N, et al. Subcortical brain alterations in major depressive disorder: findings from the ENIGMA Major Depressive Disorder working group. *Molecular Psychiatry*. 2015;21:806.
16. Schmaal L, Hibar DP, Sämann PG, Hall GB, Baune BT, Jahanshad N, et al. Cortical abnormalities in adults and adolescents with major depression based on brain scans from 20 cohorts worldwide in the ENIGMA Major Depressive Disorder Working Group. *Molecular Psychiatry*. 2016;22:900.
17. Boedhoe PSW, Schmaal L, Abe Y, Ameis SH, Arnold PD, Batistuzzo MC, et al. Distinct Subcortical Volume Alterations in Pediatric and Adult OCD: A Worldwide Meta- and Mega-Analysis. *American Journal of Psychiatry*. 2017;174(1):60-9.
18. Boedhoe PSW, Schmaal L, Abe Y, Alonso P, Ameis SH, Anticevic A, et al. Cortical Abnormalities Associated With Pediatric and Adult Obsessive-Compulsive Disorder: Findings From the ENIGMA Obsessive-Compulsive Disorder Working Group. *American Journal of Psychiatry*. 2018;175(5):453-62.
19. van Erp TGM, Hibar DP, Rasmussen JM, Glahn DC, Pearlson GD, Andreassen OA, et al. Subcortical brain volume abnormalities in 2028 individuals with schizophrenia and 2540 healthy controls via the ENIGMA consortium. *Molecular Psychiatry*. 2015;21:547.
20. van Erp TGM, Walton E, Hibar DP, Schmaal L, Jiang W, Glahn DC, et al. Cortical Brain Abnormalities in 4474 Individuals With Schizophrenia and 5098 Control Subjects via the Enhancing Neuro Imaging Genetics Through Meta Analysis (ENIGMA) Consortium. *Biological Psychiatry*. 2018;84(9):644-54.
21. Hess JL, Radonjić NV, Patak J, Glatt SJ, Faraone SV. Spatial organization of cells and variable expression of autophagy, apoptosis, and neurodevelopmental genes might underlie selective brain region vulnerability in Attention-Deficit/Hyperactivity Disorder. *bioRxiv*. 2019:652792.
22. Hess JL, Akutagava-Martins GC, Patak JD, Glatt SJ, Faraone SV. Why is there selective subcortical vulnerability in ADHD? Clues from postmortem brain gene expression data. *Mol Psychiatry*. 2017.
23. Stata Statistical Software: Release 15 [Internet]. StataCorp LLC. 2017.
24. Paulus MP, Thompson WK. The Challenges and Opportunities of Small Effects: The New Normal in Academic Psychiatry. *JAMA Psychiatry*. 2019;76(4):353-4.
25. Rimol LM, Hartberg CB, Nesvag R, Fennema-Notestine C, Hagler DJ, Jr., Pung CJ, et al. Cortical thickness and subcortical volumes in schizophrenia and bipolar disorder. *Biol Psychiatry*. 2010;68(1):41-50.
26. Berrettini W. Bipolar disorder and schizophrenia: convergent molecular data. 2004;5(1):109.
27. Dezhina Z, Ranlund S, Kyriakopoulos M, Williams SCR, Dima D. A systematic review of associations between functional MRI activity and polygenic risk for schizophrenia and bipolar disorder. *Brain imaging and behavior*. 2019;13(3):862-77.
28. Bora E, Akgul O, Ceylan D, Ozerdem A. Neurological soft signs in bipolar disorder in comparison to healthy controls and schizophrenia: A meta-analysis. *Eur Neuropsychopharmacol*. 2018;28(11):1185-93.
29. Haukvik UK, Tamnes CK, Soderman E, Agartz I. Neuroimaging hippocampal subfields in schizophrenia and bipolar disorder: A systematic review and meta-analysis. *Journal Of Psychiatric Research*. 2018;104:217-26.

30. Lizano P, Bannai D, Lutz O, Kim LA, Miller J, Keshavan M. A Meta-analysis of Retinal Cytoarchitectural Abnormalities in Schizophrenia and Bipolar Disorder. *Schizophrenia Bulletin*. 2019.
31. Thaker G. Psychosis Endophenotypes in Schizophrenia and Bipolar Disorder. *Schizophrenia Bulletin*. 2008;34(4):720-1.
32. Kim D, Kim J, Koo T, Yun H, Won S. Shared and Distinct Neurocognitive Endophenotypes of Schizophrenia and Psychotic Bipolar Disorder. *Clinical Psychopharmacology and Neuroscience*. 2015;13(1):94-102.
33. Maggioni E, Crespo-Facorro B, Nenadic I, Benedetti F, Gaser C, Sauer H, et al. Common and distinct structural features of schizophrenia and bipolar disorder: The European Network on Psychosis, Affective disorders and Cognitive Trajectory (ENPACT) study. *PLOS ONE*. 2017;12(11):e0188000.
34. Tumkaya S, Karadag F, Oguzhanoglu NK, Tekkanat C, Varma G, Ozdel O, et al. Schizophrenia with obsessive-compulsive disorder and obsessive-compulsive disorder with poor insight: A neuropsychological comparison. *Psychiatry Research*. 2009;165(1):38-46.
35. Özdemir Ö, Tükel R, Türksoy N, Üçok A. Clinical characteristics in obsessive-compulsive disorder with schizophrenia. *Comprehensive Psychiatry*. 2003;44(4):311-6.
36. Schirmbeck F, Zink M. Comorbid obsessive-compulsive symptoms in schizophrenia: contributions of pharmacological and genetic factors. *Front Pharmacol*. 2013;4:99-.
37. Swets M, Dekker J, van Emmerik-van Oortmerssen K, Smid GE, Smit F, de Haan L, et al. The obsessive compulsive spectrum in schizophrenia, a meta-analysis and meta-regression exploring prevalence rates. *Schizophrenia Research*. 2014;152(2):458-68.
38. Hwang M, L. O. Schizophrenia with Obsessive-Compulsive Features: Assessment and Treatment. *Psychiatr Ann*. 1994;24:468-72.
39. Poyurovsky M, Zohar J, Glick I, Koran LM, Weizman R, Tandon R, et al. Obsessive-compulsive symptoms in schizophrenia: implications for future psychiatric classifications. *Comprehensive Psychiatry*. 2012;53(5):480-3.
40. Grover S, Sahoo S, Surendran I. Obsessive-compulsive symptoms in schizophrenia: a review. *Acta Neuropsychiatrica*. 2019;31(2):63-73.
41. Cunill R, Castells X, Simeon D. Relationships between obsessive-compulsive symptomatology and severity of psychosis in schizophrenia: a systematic review and meta-analysis. *Journal Of Clinical Psychiatry*. 2009;70(1):70-82.
42. Smoller JW, Andreassen OA, Edenberg HJ, Faraone SV, Glatt SJ, Kendler KS. Correction to: Psychiatric genetics and the structure of psychopathology. *Mol Psychiatry*. 2018.
